# Supplementary material
Source: Research Square preprint supplement (doi:10.21203/rs.3.rs-9997431/v1)
Supplement: Supplementary file 1 [file 975ca0f548a725e81fe8c5a4.docx]

# Additional file 1

Text 1: Scoping Review Search Strategy

**Research question**: A scoping review of laboratory studies on the effects of temperature on adult *Culex pipiens* longevity and reproduction

**Dataset**: Embase, Scopus, Web of science

**Search date:** 16th September 2025

**Embase – 156 records**

Database: Embase Classic+Embase <1947 to 2025 Week 37>
Search Strategy:
1  (culex pipiens or cx pipiens or molestus).mp. [mp=title, abstract, heading word, drug trade name, original title, device manufacturer, drug manufacturer, device trade name, keyword heading word, floating subheading word, candidate term word] (4954)
2  culex pipiens/ or exp culex pipiens molestus/ or exp culex pipiens pipiens/ (2438)
3  1 or 2 (4954)
4  temperature.mp. or exp temperature/ (1218100)
5  (longevity or lifespan or surviv* or mortality or reproduct* or oviposition or production or laying or fecundity or fertility or gonotrophic).mp. [mp=title, abstract, heading word, drug trade name, original title, device manufacturer, drug manufacturer, device trade name, keyword heading word, floating subheading word, candidate term word] (6933488)
6  3 and 4 and 5 (156)

**Scopus – 232 records**

TITLE-ABS-KEY ( ( "Culex pipiens" OR "Cx. pipiens" OR "molestus" ) AND ( temperature ) AND ( longevity OR lifespan OR surviv* OR mortality OR reproduct* OR oviposition OR production OR laying OR fecundity OR fertility OR gonotrophic ) )

**Web of Science – 228 records**

Topic ("Culex pipiens" OR "Cx. pipiens" OR “molestus”) AND (temperature) AND (longevity OR lifespan OR surviv* OR mortality OR reproduct* OR oviposition OR production OR laying OR fecundity OR fertility OR gonotrophic)

**Inclusion criteria:**

- Quantitative results for adult traits
- Laboratory conditions
- Paper in all languages
- *Culex* pipiens is the investigated species

**Exclusion criteria:**

- No mention of temperature
- The study was carried out in field only
- Results for immature stages only
- Pesticide effectiveness studies
