# Supplementary material
Source: Research Square preprint supplement (doi:10.21203/rs.3.rs-9997431/v1)
Supplement: Supplementary file 2 [file fbbdaab6432e1ee78969d411.xlsx]

## Sheet: longevity
Temperature	Longevity (Days)	Collection time
25	74	mid season
25	76	mid season
25	43	mid season
25	77	mid season
25	53	mid season
25	56	mid season
25	62	mid season
25	74	mid season
25	62	mid season
25	32	mid season
25	43	mid season
25	53	mid season
25	50	mid season
25	72	mid season
25	93	mid season
25	60	mid season
25	50	mid season
25	43	mid season
25	72	mid season
25	95	mid season
28	17	late season
28	49	late season
28	84	late season
28	54	late season
28	53	late season
28	66	late season
28	73	late season
28	47	late season
28	54	late season
28	55	late season
28	43	late season
28	44	late season
28	52	late season
28	66	late season
28	12	late season
28	51	late season
28	48	late season
28	54	late season
28	57	late season
28	66	late season
31	36	mid season
31	46	mid season
31	33	mid season
31	49	mid season
31	41	mid season
31	33	mid season
31	40	mid season
31	40	mid season
31	12	mid season
31	40	mid season
31	20	mid season
31	35	mid season
31	43	mid season
31	28	mid season
31	48	mid season
31	23	mid season
31	36	mid season
31	33	mid season
31	14	mid season
31	14	mid season

## Sheet: reproduction
Temperature	Eggs per raft	Gonotrophic cycle length (Days)	Collection time
25	128	4	mid season
25	106	6	mid season
25	204	42	mid season
25	111	4	mid season
25	116	13	mid season
28	94	22	late season
28	91	15	late season
28	93	20	late season
28	82	13	late season
28	152	9	mid season
28	71	4	mid season
28	96	6	mid season
28	142	6	mid season
28	119	5	mid season
28	150	14	mid season
28	97	14	mid season
28	135	7	mid season
31	150	11	mid season
31	193	4	mid season
